# Supplementary material for: Biallelic variants in the SORD gene are one of the most common causes of hereditary neuropathy among Czech patients
Source: PubMed Central journal article supplement (PMC8055917; doi:10.1038/s41598-021-86857-0), 2021-04-19
Supplement: 41598_2021_86857_MOESM1_ESM.pdf [file 41598_2021_86857_MOESM1_ESM.pdf]

Supplementary file for manuscript:

## Biallelic variants in the *SORD* gene are one of the most common causes of hereditary neuropathy among Czech patients

### Author list:

P.Laššuthová<sup>1\*</sup>, R.Mazanec<sup>2</sup>, D.Staněk<sup>1</sup>, L.Sedláčková<sup>1</sup>, B.Plevová<sup>1,3</sup>, J. Haberlová<sup>3</sup>, and P.Seeman<sup>1</sup>

### Affiliations:

1- Neurogenetic laboratory, Department of Paediatric Neurology, Second Faculty of Medicine (2. LF UK) and University Hospital Motol, Prague, the Czech Republic

2- Department of Neurology, Second Faculty of Medicine (2. LF UK) and University Hospital Motol, Prague, the Czech Republic

3- Department of Paediatric Neurology, Second Faculty of Medicine (2. LF UK) and University Hospital Motol, Prague, the Czech Republic

\* corresponding author

### Contact information for corresponding author

Petra Laššuthová, M.D., Ph.D.  
Neurogenetic lab  
Department of Paediatric Neurology  
Second Faculty of Medicine, Charles University in Prague and  
Motol University Hospital

#### Contact details:

V Úvalu 84, 150 06 - Prague 5  
The Czech Republic

Phone: +420224436788

Email: [petra.lassuthova@fnmotol.cz](mailto:petra.lassuthova@fnmotol.cz)

Content

Biallelic variants in the *SORD* gene are one of the most common causes of hereditary neuropathy among Czech patients ..... 1

1. Supplementary methods ..... 3

    1.1. Patients ..... 3

        1.1.1. Patient selection criteria ..... 3

    1.2. Methods ..... 4

        1.2.1. DNA fragment analysis by capillary electrophoresis ..... 4

        1.2.2. Sanger sequencing of the *SORD* gene ..... 6

        1.2.3. Analysis of WES data ..... 10

Figures:

Figure 1: Characterization of types of neuropathy for patients selected for fragmentation analysis.... 3

Figure 2: Fragment analysis results ..... 5

Figure 3: **PCR products for exon 8 of the SORD/SORD2P** ..... 7

Figure 4: **Electropherograms of SORD exon 7** ..... 9

Tables:

Table 1: Type of neuropathy among patients tested with fragment analysis ..... 3

Table 2: Primers used for fragment analysis ..... 4

Table 3: Primers used in this study..... 6

Table 4: Other variants detected with WES in patients with biallelic SORD disease causing variants. 11

## 1. Supplementary methods

### 1.1. Patients

#### 1.1.1. Patient selection criteria

Fragment analysis was used as a screening method for the prevalent c.757del variant. Therefore, we opted for the testing of as many patients with inherited peripheral neuropathy, as possible. In fact, we tested all the available DNA samples without autosomal dominant inheritance in the family and with an unclarified cause of the disease from our database.

From the 931 selected patients, 41% have axonal neuropathy, 16% demyelinating and 6% intermediate. The information was not available for 18% of the patients and the type of neuropathy was undecidable based on the available documentation in 19% of patients. This is shown in table 1 and in figure 1, below.

| Type of neuropathy    | Number of patients |
|-----------------------|--------------------|
| Axonal                | 387                |
| Demyelinating         | 152                |
| Intermediate          | 52                 |
| Undecidable           | 175                |
| N.A.                  | 165                |
| <b>Total selected</b> | <b>931</b>         |

Table 1: Type of neuropathy among patients tested with fragment analysis

■ Axonal ■ Demyelinating ■ Intermediate ■ Undecidable ■ N.A.

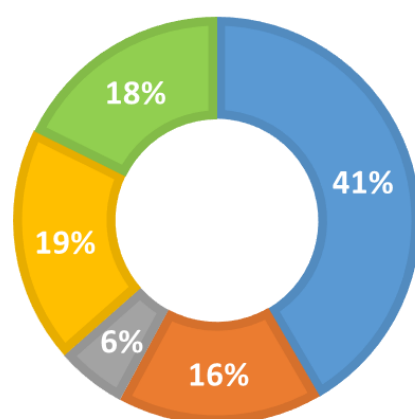

Figure 1: Characterization of types of neuropathy for patients selected for fragmentation analysis

Legend: Undecidable – not possible to decide based on available information from electromyography study; N.A. – no information available from the nerve conduction study

## 1.2. Methods

### 1.2.1. DNA fragment analysis by capillary electrophoresis

The principle of fragment analysis is amplification of the target DNA with labelled primers. Gained products are then separated by capillary electrophoresis and the relative size of each product is determined. Accordingly, it is possible to state a genotype of a sample.

For our fragment analysis these primers were used:

|                                                      |                          |
|------------------------------------------------------|--------------------------|
| Forward primer labelled with FAM<br>(5'-3' sequence) | CGCCAGGAAAGTAGAAGGTCA    |
| Reverse primer<br>(5'-3' sequence)                   | AAAAGAAAACATAGATGGCAAAGA |

Table 2: Primers used for fragment analysis

Based on in-silico PCR (<https://genome.ucsc.edu/cgi-bin/hgPcr>), the resulting PCR product is: [>chr15:45361160+45361390](#) 231bp

```
CGCCAGGAAAGTAGAAGGTCAAAAAGAAAACATAGATGGCAAAGACGCCAGGAAAGTAGAAGGTCAgctggg
gtgcaagccggaagtcaccatcgagtgacgggggagaggcctccatccaggcgggcatctacgtgagtgaggctgaggcagctttggggaatc
agcatagggagtgaggaggcagaagtagggagtcaaacttcttaccagcttgctgctgagcccaagccaaactattcaTCTTTTGCCTC
TATGTTTTCTTT
```

Fragment analysis was aimed at the detection of the c.757del. Therefore, the wild type allele should be 231bp in length, and the mutant allele should be one bp shorter – 230bp.

Standard PCR thermal cycling parameters were used, with annealing temperature 60°C and 30 cycles. For PCR mix chemistry from our local distributor was used – CombiPPP (<http://www.top-bio.cz/pcr-master-mixy-12.html?combi-ppp-master-mix>). Size standard GS1200 LIZ (<https://www.thermofisher.com/order/catalog/product/4379950#/4379950>) was used. Products were separated on an ABI 3130 capillary sequencer (<https://www.thermofisher.com/order/catalog/product/313001R#/313001R>) and analysed with GeneMapper software v4.0 (<https://www.thermofisher.com/order/catalog/product/4440915#/4440915>).

Results are shown in Figure 2.

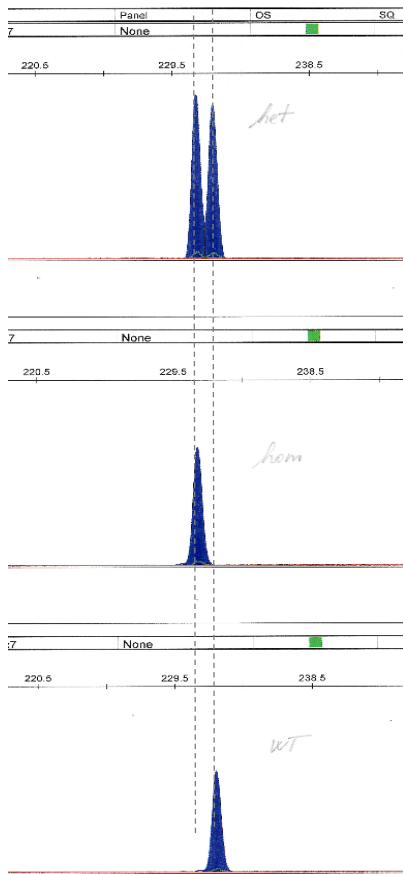

Figure 2: Fragment analysis results

**Legend:** Three samples are shown. The sample in the upper part represents a heterozygous carrier of c.757del on one allele and a wild type on the second allele of the SORD gene. The sample in the middle part is homozygous for the c. 757del. The sample in the lower part is a wild type control.

Our forward primer took advantage from the SNP: Chr15(GRCh38):g.45068982A>T , which was supposed to be A in gene and T in the pseudogene sequence. The SNP was located at the 3' end of the primer for the highest possible specificity. This SNP has a stated frequency in gnomAD genomes: 25%, but in the original paper it was used for gene/pseudogene discrimination [1]. The gnomAD frequency could have been explained by misalignment due to high gene/pseudogene homology. However, later on we learned that this SNP is also present in the gene sequence with a relatively high frequency (17% in our samples). Therefore, we cannot recommend to use our fragment analysis protocol, as serious allelic dropout might result. For screening of the c.757del variant, Sanger sequencing of exon 7 with gene specific primers and with the exclusion of the SORD2P is the best option we can recommend.

### 1.2.2. Sanger sequencing of the *SORD* gene

These PCR primers were used in our study (Table 3):

| Primer            | 5'-3' sequence               |
|-------------------|------------------------------|
| SORD_ex9_R        | CCCTGAGATCCCAAGACTG          |
| SORD_ex9_F        | CACCTGGCTCTTTCCTCTTG         |
| SORD_ex8_R_new    | TCCTCCCATTCTTTAACTGGC        |
| SORD_ex8_F        | TCCCGCTCAGTTAAGTTTGG         |
| SORD_ex7_R_SQ_new | GCTCACGCAGCAAGCTGGTAAAG      |
| SORD_ex7_R        | AGCCTGGGCGACTGAGTGAG         |
| SORD_ex7_F        | TGAGTCATCAGATTTCTCTGTTTG     |
| SORD_ex6_R        | GCTGTTTCCCAGTCAAGGAG         |
| SORD_ex6_F        | ATGTTTAATATTTACGAACATATTCC   |
| SORD_ex5_R        | GTTCCCTGAATCCCAGTCA          |
| SORD_ex5_F        | CGTGGCCATGTTAACTCCTT         |
| SORD_ex4_R        | CGAGGTCATTGTTGTTATGACG       |
| SORD_ex4_F        | GCATGCAAGCCTTCATAACA         |
| SORD_ex3_R        | TCTTGTTCCCTGCTGTACCC         |
| SORD_ex3_F        | ACCTTTTCTCATAAATAGATACGAATCC |
| SORD_ex2_R        | GCAGTAGACTCTGTTCTCAGCCTAAC   |
| SORD_ex2_F        | AGCGTGCCATTTAGCGTATC         |
| SORD_ex1_R        | AGTGAGGCAGGATCGGTATG         |
| SORD_ex1_F        | CAGGCTGGCACAAAGGAG           |

Table 3: Primers used in this study

For primers from the original publication [1] for ex8 (5'-3' sequence: Forward - TCCCGCTCAGTTAAGTTTGG and reverse- GCTTCAAATCCCCTCCTTC) two products are amplified:

>[chr15:45072130+45072670](#) 541bp length

>[chr15\\_KI270849v1\\_alt:152235-153076](#) 842bp length

With newly designed reverse primer (5'-3' sequence: Forward - TCCCGCTCAGTTAAGTTTGG and reverse- TCCTCCCATTCTTTAACTGGC), one PCR product for ex8 is amplified:

>[chr15:45072130+45072627](#) 498bp

This is illustrated below (from <https://genome.ucsc.edu/cgi-bin/hgPcr>):

**A.**

```
>chr15:45072130+45072670 541bp TCCCGCTCAGTTAAGTTTGG GCTTCAAATCCCCTCCTTC
TCCCGCTCAGTTAAGTTTGGTtggcaggttgagcagttcagcagtgata caaatcacattctcaggaatggatgctcagctgatgcaaccagaag
atacttgatgatgacaatatgtattgtaagtgggaagtcagttattct tatcttctgagctttctgtttttacctccttacaggccactcgtctg
gtgggaacctcgtgcttggggctgggctctgagatgaccaccgtacc ctactgcatgcagccatccgggaggtggatatcaaggcgctgttcgata
ctgcaacacgtgagatgcccgtgggtgagccgggatcccagcctccagc aagaccatggcaggccccactcagcctctggcccatgagctctcctg
ttgttcatgggggactcctggccacactgatagctgtgatataa caggatccaaagagagaacactcactgcccagttaaagaatgggaggaac
agaaggatggatggaggaggGAAGGAGGGGATTTGAAGC

>chr15_KI270849v1 alt:152235-153076 842bp TCCCGCTCAGTTAAGTTTGG GCTTCAAATCCCCTCCTTC
TCCCGCTCAGTTAAGTTTGGTtggcaggttgagcagttcagcagtgata caaatcacattctcaggaatggatgctcagctgatgcaaccagaag
atacttgatgatgacaatatgtattgtaagtgggaagtcagttattct tatcttctgagctttctgtttttacctccttacaggccactcgtctg
gtgggaacctcgtgcttggggctgggctctgagatgaccaccgtacc ctactgcatgcagccatccgggaggtggatatcaaggcgctgttcgata
ctgcaacacgtgagatgctgtgggtgagccgggatcccagcctccagc aagaccatggcaggccccactcagcctctggcccatgagctctcctg
ttgttcatgggggactcctggccacactgatagctgtgatatac agggatccaaagagagaacactcactcccaatgaagaatgggaaggccg
ggcgtggcgctcagctgtaatccagcacttgggagggcaggcag gcggatcacgaggtcaggagatcgagagatcctggtaaacacggtgacc
cctgtctactaaaaatacaaaaaattagccaggcatggtggtgggtg ctgtagtcccagctactgggatgctgaggcaggagagtggtgtaacc
aggaggcagagattgagtgagcggagatgcaccactgactccagcct gggcaacagagccagactctgtctcaaaaaaaaaaagaatgggaggaa
cagaaggatggatggaggaggGAAGGAGGGGATTTGAAGC
```

**B.**

**UCSC In-Silico PCR**

```
>chr15:45072130+45072627 498bp TCCCGCTCAGTTAAGTTTGG TCCTCCATTCTTTAACTGGC
TCCCGCTCAGTTAAGTTTGGTtggcaggttgagcagttcagcagtgata
caaatcacattctcaggaatggatgctcagctgatgcaaccagaag
atacttgatgatgacaatatgtattgtaagtgggaagtcagttattct
tatcttctgagctttctgtttttacctccttacaggccactcgtctg
gtgggaacctcgtgcttggggctgggctctgagatgaccaccgtacc
ctactgcatgcagccatccgggaggtggatatcaaggcgctgttcgata
ctgcaacacgtgagatgcccgtgggtgagccgggatcccagcctccagc
aagaccatggcaggccccactcagcctctggcccatgagctctcctg
ttgttcatgggggactcctggccacactgatagctgtgatataa
caggatccaaagagagaacactcactGCCAGTTAAAGAATGGGAGGA
```

**Primer Melting Temperatures**

**Forward:** 60.2 C tcccgcctcagttaagtttgg  
**Reverse:** 60.4 C tcctcccattctttaactggc

Figure 3: PCR products for exon 8 of the SORD/SORD2P

**Legend:**

**PART A.:** PCR products gained with amplification with primers for exon 8 from the original publication by Cortese, et al. both, gene (SORD) and pseudogene (SORD2P) exon 8 is amplified.

**PART B.:** Only one specific product for gene specific exon 8 is gained with our proposed primers.

Figure 4 presents electrophoreograms for exon 7 of the SORD gene. And sequences are compared to the SORD2P (pseudogene) sequence. Four differences used for discrimination are illustrated (red rectangles).





### 1.2.3. Analysis of WES data

For samples that went through WES analysis, we present results from analysis, to discuss which different variants in the known neuropathy genes were seen. Criteria for filtering are in the first line of the table. As data in the table presents, no other interesting variants, that could possibly explain the cause of the disease, were detected with WES in those three families. The evaluation and conclusion for each of the variants is in the first row of the table.

| Filters:                                                                                                                                                          |       | Function: exonic or splicing; GnomAD Exome all: frequency less than 0.01%; OMIM related to Inherited peripheral neuropathy |          |        |     |                        |           |           |                                              |                                                                                                                                                                                                     |          |
|-------------------------------------------------------------------------------------------------------------------------------------------------------------------|-------|----------------------------------------------------------------------------------------------------------------------------|----------|--------|-----|------------------------|-----------|-----------|----------------------------------------------|-----------------------------------------------------------------------------------------------------------------------------------------------------------------------------------------------------|----------|
| <b>Fam 5</b>                                                                                                                                                      |       |                                                                                                                            |          |        |     |                        |           |           |                                              |                                                                                                                                                                                                     |          |
|                                                                                                                                                                   | Chr   | Start                                                                                                                      | End      | Ref    | Alt | gNomen                 | Func.refG | Gene.refG | ExonicFunc.refGene                           | AAChange.refGene                                                                                                                                                                                    | Genotype |
| SORD                                                                                                                                                              | chr15 | 45357501                                                                                                                   | 45357501 | C      | A   | chr15:45357501C>A      | exonic    | SORD      | nonsynonymous SNV                            | SORD:NM_003104:exon5:c.C458A:p.A153D                                                                                                                                                                | HET      |
| SORD                                                                                                                                                              | chr15 | 45361217                                                                                                                   | 45361217 | G      | -   | chr15:45361217G>-      | exonic    | SORD      | frameshift deletion                          | SORD:NM_003104:exon7:c.753delG:p.A253Qfs*27                                                                                                                                                         | HET      |
| UTR5                                                                                                                                                              | chr12 | 57979190                                                                                                                   | 57979190 | C      | G   | chr12:57979190C>G      | UTR3      | KIF5A     | NM_004984:c.*1226C>G;NM_001354705:c.*1226C>G |                                                                                                                                                                                                     | HET      |
| <b>Fam 13</b>                                                                                                                                                     |       |                                                                                                                            |          |        |     |                        |           |           |                                              |                                                                                                                                                                                                     |          |
|                                                                                                                                                                   | Chr   | Start                                                                                                                      | End      | Ref    | Alt | gNomen                 | Func.refG | Gene.refG | ExonicFunc.refGene                           | AAChange.refGene                                                                                                                                                                                    | Genotype |
| different phenotype (HSN), autosomal recessive phenotype, only one variant in heterozygous state, second variant is missing                                       | chr6  | 56434712                                                                                                                   | 56434712 | G      | T   | chr6:56434712G>T       | exonic    | DST       | nonsynonymous SNV                            | DST:NM_015548:exon35:c.C5951A:p.P1984H,DST:NM_183380:exon45:c.C6929A:p.P2310H,DST:NM_001144770:exon46:c.C7049A:p.P2350H,DST:NM_001144769:exon48:c.C7463A:p.P2488H                                   | HET      |
| different phenotype (HSN), autosomal dominant, ClinVar: likely benign, GnomAD frequency: 0.21%                                                                    | chr12 | 994324                                                                                                                     | 994324   | A      | G   | chr12:994324A>G        | exonic    | WNK1      | nonsynonymous SNV                            | WNK1:NM_014823:exon17:c.A3613G:p.T1205A,WNK1:NM_01184985:exon19:c.A5134G:p.T1712A,WNK1:NM_018979:exon19:c.A4354G:p.T1452A,WNK1:NM_213655:exon19:c.A5110G:p.T1704A                                   | HET      |
| SORD                                                                                                                                                              | chr15 | 45361217                                                                                                                   | 45361217 | G      | -   | chr15:45361217G>-      | exonic    | SORD      | frameshift deletion                          | SORD:NM_003104:exon7:c.753delG:p.A253Qfs*27                                                                                                                                                         | HOM      |
| This is a known rare polymorphism in the PMP22 - not causal (population frequency is 0.42%, we have seen this variant repeatedly as not causal for CMT phenotype) | chr17 | 15134364                                                                                                                   | 15134364 | G      | A   | chr17:15134364G>A      | exonic    | PMP22     | nonsynonymous SNV                            | PMP22:NM_153322:exon4:c.C353T:p.T118M,PMP22:NM_000304:exon5:c.C353T:p.T118M,PMP22:NM_001281455:exon5:c.C353T:p.T118M,PMP22:NM_001281456:exon5:c.C353T:p.T118M,PMP22:NM_153321:exon5:c.C353T:p.T118M | HET      |
| heterozygous for one missense variant, variant on the second allele is not present, PRX are mostly frameshift (nonsense) variants                                 | chr19 | 40903436                                                                                                                   | 40903436 | G      | T   | chr19:40903436G>T      | exonic    | PRX       | nonsynonymous SNV                            | PRX:NM_181882:exon7:c.C823A:p.L275I                                                                                                                                                                 | HET      |
| different phenotype : IPN + deafness, autosomal recessive inheritance, only one heterozygous variant, no second variant                                           | chr19 | 50766582                                                                                                                   | 50766582 | C      | T   | chr19:50766582C>T      | exonic    | MYH14     | nonsynonymous SNV                            | MYH14:NM_024729:exon20:c.C2476T:p.R826C,MYH14:NM_01077186:exon21:c.C2500T:p.R834C,MYH14:NM_001145809:exon22:c.C2599T:p.R867C                                                                        | HET      |
| <b>Fam 10</b>                                                                                                                                                     |       |                                                                                                                            |          |        |     |                        |           |           |                                              |                                                                                                                                                                                                     |          |
|                                                                                                                                                                   | Chr   | Start                                                                                                                      | End      | Ref    | Alt | gNomen                 | Func.refG | Gene.refG | ExonicFunc.refGene                           | AAChange.refGene                                                                                                                                                                                    | Genotype |
| noncoding exon                                                                                                                                                    | chr10 | 64578298                                                                                                                   | 64578298 | -      | A   | chr10:64578298->A      | splicing  | EGR2      |                                              |                                                                                                                                                                                                     | HET      |
| NM_015915.4(ATL1):c.723+3_723+19del, intronic deletion                                                                                                            | chr14 | 51080068                                                                                                                   | 51080084 | AGGTTT | -   | chr14:51080068AGGTTTGG | exonic    | ATL1      | frameshift deletion                          | ATL1:NM_015915:exon7:c.722_723del:p.K241Sfs*7,ATL1:NM_181598:exon7:c.722_723del:p.K241Sfs*7,ATL1:NM_001127713:exon8:c.722_723del:p.K241Sfs*7                                                        | HET      |
| SORD                                                                                                                                                              | chr15 | 45357501                                                                                                                   | 45357501 | C      | A   | chr15:45357501C>A      | exonic    | SORD      | nonsynonymous SNV                            | SORD:NM_003104:exon5:c.C458A:p.A153D                                                                                                                                                                | HET      |
| SORD                                                                                                                                                              | chr15 | 45361217                                                                                                                   | 45361217 | G      | -   | chr15:45361217G>-      | exonic    | SORD      | frameshift deletion                          | SORD:NM_003104:exon7:c.753delG:p.A253Qfs*27                                                                                                                                                         | HET      |

Table 4: Other variants detected with WES in patients with biallelic SORD disease causing variants.

References:

1. Cortese, A., et al., *Biallelic mutations in SORD cause a common and potentially treatable hereditary neuropathy with implications for diabetes*. Nat Genet, 2020. **52**(5): p. 473-481.
